# Supplementary material for: Hereditary leukoencephalopathy with axonal spheroids: a spectrum of phenotypes from CNS vasculitis to parkinsonism in an adult onset leukodystrophy series
Source: HighWire-hosted journal article supplement (doi:10.1136/jnnp-2015-310788), 2015-05-02
Supplement: jnnp-2015-310788supp_table1.pdf [file jnnp-2015-310788supp_table1.pdf]

Supplementary Table 1: Summary of all reported CSF1R mutations, exons, age at onset and age at death.

| Author                  | Year | Mutation               | Exon  | Age at onset | Age at death | Disease duration |
|-------------------------|------|------------------------|-------|--------------|--------------|------------------|
| Rademakers <sup>1</sup> | 2011 | G589E                  | 13    | 47           | 58           | 11               |
| Rademakers              | 2011 | G589E                  | 13    | 58           | 61           | 3                |
| Rademakers              | 2011 | E633K                  | 14    | 42           | 46           | 4                |
| Rademakers              | 2011 | E633K                  | 14    | 67           | 74           | 7                |
| Rademakers              | 2011 | E633K                  | 14    | 78           | 84           | 6                |
| Rademakers              | 2011 | M766T                  | 17    | 18           | N/A          | N/A              |
| Rademakers              | 2011 | M766T                  | 17    | 43           | N/A          | N/A              |
| Rademakers              | 2011 | I755N                  | 17    | 48           | N/A          | N/A              |
| Rademakers              | 2011 | A770P                  | 17    | 52           | 63           | 11               |
| Rademakers              | 2011 | I794T                  | 18    | 35           | N/A          | N/A              |
| Rademakers              | 2011 | F849del                | 19    | 63           | 67           | 4                |
| Rademakers              | 2011 | D837Y                  | 19    | N/A          | N/A          | N/A              |
| Rademakers              | 2011 | F849S                  | 19    | N/A          | N/A          | N/A              |
| Rademakers              | 2011 | P878T                  | 20    | 39           | 49           | 10               |
| Rademakers              | 2011 | P878T                  | 20    | 39           | 43           | 4                |
| Rademakers              | 2011 | M875T                  | 20    | 41           | N/A          | N/A              |
| Rademakers              | 2011 | M875T                  | 20    | 46           | N/A          | N/A              |
| Rademakers              | 2011 | L868P                  | 20    | 55           | 63           | 8                |
| Rademakers              | 2011 | M875T                  | 20    | 58           | N/A          | N/A              |
| Rademakers              | 2011 | M875T                  | 20    | 71           | N/A          | N/A              |
| Rademakers              | 2011 | M875T                  | 20    | N/A          | N/A          | N/A              |
| Rademakers              | 2011 | Gly585_lys619delinsAla | IVS12 | 36           | 40           | 4                |
| Rademakers              | 2011 | Gly585_lys619delinsAla | IVS12 | 38           | 41           | 3                |
| Rademakers              | 2011 | C774_N814delins        | IVS18 | 23           | N/A          | N/A              |
| Rademakers              | 2011 | cys774_asn814del       | IVS18 | 50           | 55           | 5                |
| Kinoshita <sup>2</sup>  | 2012 | R782H                  | 18    | 51           | N/A          | N/A              |
| Kleinfeld <sup>3</sup>  | 2013 | I794T                  | 18    | 37           | N/A          | N/A              |
| Kleinfeld               | 2013 | F828S                  | 19    | 39           | N/A          | N/A              |
| Kleinfeld               | 2013 | F828S                  | 19    | 47           | N/A          | N/A              |
| Kondo <sup>4</sup>      | 2013 | K793T                  | 18    | 40           | N/A          | N/A              |
| Mitsui <sup>5</sup>     | 2012 | C653Y                  | 14    | 43           | N/A          | N/A              |
| Mitsui                  | 2012 | C653Y                  | 14    | 48           | N/A          | N/A              |
| Mitsui                  | 2012 | R777W                  | 18    | 38           | N/A          | N/A              |
| Mitsui                  | 2012 | I794T                  | 18    | 52           | N/A          | N/A              |
| Mitsui                  | 2012 | I794T                  | 18    | 60           | N/A          | N/A              |
| Mitsui                  | 2012 | R777W                  | 18    | 65           | N/A          | N/A              |
| Ahmed <sup>6</sup>      | 2013 | A781V                  | 18    | 32           | N/A          | N/A              |
| Ahmed                   | 2013 | A781V                  | 18    | 54           | N/A          | N/A              |

|                         |      |            |       |     |     |     |
|-------------------------|------|------------|-------|-----|-----|-----|
| Ahmed                   | 2013 | A781V      | 18    | 58  | N/A | N/A |
| Ahmed                   | 2013 | A781V      | 18    | 60  | N/A | N/A |
| Ahmed                   | 2013 | A781V      | 18    | 67  | N/A | N/A |
| Fujioka <sup>7</sup>    | 2013 | G589E      | 13    | 46  | N/A | N/A |
| Fujioka                 | 2013 | G589E      | 13    | 47  | N/A | N/A |
| Fujioka                 | 2013 | G589E      | 13    | 58  | N/A | N/A |
| Fujioka                 | 2013 | G589E      | 13    | 59  | N/A | N/A |
| Guerreiro <sup>8</sup>  | 2013 | T567fsX44  | 12    | 24  | N/A | N/A |
| Guerreiro               | 2013 | L630R      | 14    | 45  | N/A | N/A |
| Guerreiro               | 2013 | E633K      | 14    | 46  | N/A | N/A |
| Guerreiro               | 2013 | R777Q      | 18    | 44  | N/A | N/A |
| Guerreiro               | 2013 | R777W      | 18    | 46  | N/A | N/A |
| Guerreiro               | 2013 | I794T      | 18    | 46  | N/A | N/A |
| Guerreiro               | 2013 | R777Q      | 18    | 58  | N/A | N/A |
| Guerreiro               | 2013 | R777Q      | 18    | 60  | N/A | N/A |
| Guerreiro               | 2013 | L817P      | 19    | 36  | N/A | N/A |
| Guerreiro               | 2013 | I827T      | 19    | 44  | N/A | N/A |
| Guerreiro               | 2013 | E847D      | 19    | 44  | N/A | N/A |
| Guerreiro               | 2013 | Y856H      | 20    | 39  | N/A | N/A |
| Guerreiro               | 2013 | Y856H      | 20    | 42  | N/A | N/A |
| Guerreiro               | 2013 | Y856H      | 20    | 42  | N/A | N/A |
| Guerreiro               | 2013 | Y856H      | 20    | 47  | N/A | N/A |
| Guerreiro               | 2013 | Y856H      | 20    | 55  | N/A | N/A |
| Guerreiro               | 2013 | P901S      | 21    | 20  | N/A | N/A |
| Guerreiro               | 2013 | c2655-2A>G | IVS20 | 50  | N/A | N/A |
| Inui <sup>9</sup>       | 2013 | A777Gly    | 18    | 24  | N/A | N/A |
| Karle <sup>10</sup>     | 2013 | I794T      | 18    | 29  | N/A | N/A |
| Karle                   | 2013 | R777Q      | 18    | 38  | N/A | N/A |
| Karle                   | 2013 | I794T      | 18    | 40  | N/A | N/A |
| Karle                   | 2013 | A781V      | 18    | 50  | N/A | N/A |
| Karle                   | 2013 | I843N      | 19    | 40  | N/A | N/A |
| Karle                   | 2013 | V838L      | 19    | 53  | N/A | N/A |
| Karle                   | 2013 | Q877X      | 20    | 28  | N/A | N/A |
| Nicholson <sup>11</sup> | 2013 | M766T      | 17    | 51  | N/A | N/A |
| Nicholson               | 2013 | R782H      | 18    | N/A | N/A | N/A |
| Saitoh <sup>12</sup>    | 2013 | I794T      | 18    | 28  | N/A | N/A |
| Sundal <sup>13</sup>    | 2013 | G589E      | 13    | 58  | N/A | N/A |
| Sundal                  | 2013 | E633K      | 14    | 42  | N/A | N/A |
| Sundal                  | 2013 | E633K      | 14    | 67  | N/A | N/A |
| Sundal                  | 2013 | M766T      | 17    | 18  | N/A | N/A |
| Sundal                  | 2013 | M766T      | 17    | 27  | N/A | N/A |

|                            |      |                        |       |     |     |     |
|----------------------------|------|------------------------|-------|-----|-----|-----|
| Sundal                     | 2013 | M766T                  | 17    | 43  | N/A | N/A |
| Sundal                     | 2013 | I755Asn                | 17    | 48  | N/A | N/A |
| Sundal                     | 2013 | A770P                  | 17    | 52  | N/A | N/A |
| Sundal                     | 2013 | I794T                  | 18    | 35  | N/A | N/A |
| Sundal                     | 2013 | I794T                  | 18    | 57  | N/A | N/A |
| Sundal                     | 2013 | M875T                  | 20    | 58  | N/A | N/A |
| Sundal                     | 2013 | M875T                  | 20    | 71  | N/A | N/A |
| Sundal                     | 2013 | Gly585_lys619delinsAla | IVS12 | 36  | N/A | N/A |
| Sundal                     | 2013 | Gly585_lys619delinsAla | IVS12 | 38  | N/A | N/A |
| Sundal                     | 2013 | cys774_asn814del       | IVS18 | 23  | N/A | N/A |
| Sundal                     | 2013 | cys774_asn814del       | IVS18 | 50  | N/A | N/A |
| Terasawa <sup>14</sup>     | 2013 | A823V                  | 19    | 52  | N/A | N/A |
| Battisti <sup>15</sup>     | 2014 | C653R                  | 14    | 48  | N/A | N/A |
| Battisti                   | 2014 | I843F                  | 19    | 56  | N/A | N/A |
| Battisti                   | 2014 | I1906T                 | 21    | 37  | N/A | N/A |
| Hoffmann <sup>16</sup>     | 2014 | R777Q                  | 18    | 22  | N/A | N/A |
| Hoffmann                   | 2014 | R777Q                  | 18    | 29  | N/A | N/A |
| Hoffmann                   | 2014 | R777Q                  | 18    | 30  | N/A | N/A |
| Hoffmann                   | 2014 | R777Q                  | 18    | 40  | N/A | N/A |
| Kitani Morii <sup>17</sup> | 2014 | I794T                  | 18    | N/A | N/A | N/A |
| Konno <sup>18</sup>        | 2014 | S688Efx13              | 15    | 41  | N/A | N/A |
| Konno                      | 2014 | G765D                  | 17    | 37  | N/A | N/A |
| Konno                      | 2014 | A781E                  | 18    | 36  | N/A | N/A |
| Konno                      | 2014 | I794T                  | 18    | 40  | N/A | N/A |
| Konno                      | 2014 | I794T                  | 18    | 55  | N/A | N/A |
| Konno                      | 2014 | P842S                  | 19    | 45  | N/A | N/A |
| Konno                      | 2014 | C2442+1G>T             | IVS18 | 53  | 57  | 4   |
| La Piana <sup>19</sup>     | 2014 | V784M                  | 18    | 39  | N/A | N/A |
| Levin <sup>20</sup>        | 2014 | V838L                  | 19    | N/A | N/A | N/A |
| Schuberth <sup>21</sup>    | 2014 | L582P                  | 12    | 54  | N/A | N/A |
| Schuberth                  | 2014 | E633K                  | 14    | 41  | N/A | N/A |
| Schuberth                  | 2014 | V838L                  | 19    | 45  | N/A | N/A |
| Sundal <sup>22</sup>       | 2015 | Asn854Lys              | 20    | 29  | N/A | N/A |
| Sundal                     | 2015 | Asn854Lys              | 20    | 38  | N/A | N/A |
| Sundal                     | 2015 | Asn854Lys              | 20    | 42  | N/A | N/A |
| Sundal                     | 2015 | Asn854Lys              | 20    | 44  | N/A | N/A |
| Sundal                     | 2015 | Asn854Lys              | 20    | 45  | N/A | N/A |
| Sundal                     | 2015 | Asn854Lys              | 20    | 50  | N/A | N/A |
| Kim <sup>23</sup>          | 2015 | M766V                  | 17    | 39  | N/A | N/A |
| Kim                        | 2015 | R782H                  | 18    | 37  | 42  | 5   |
| Kim                        | 2015 | A781V                  | 18    | 41  | N/A | N/A |

|       |      |             |       |    |     |     |
|-------|------|-------------|-------|----|-----|-----|
| Kim   | 2015 | A781V       | 18    | 44 | 49  | 5   |
| Lynch | 2015 | V596M       | 13    | 31 | 36  | 5   |
| Lynch | 2015 | E633K       | 14    | 29 | N/A | N/A |
| Lynch | 2015 | A763P       | 17    | 45 | 51  | 6   |
| Lynch | 2015 | G825L       | 19    | 42 | N/A | N/A |
| Lynch | 2015 | c2442+1 G>a | IVS18 | 44 | N/A | N/A |
|       |      |             |       |    |     |     |

### SUPPLEMENTARY REFERENCES

1. Rademakers, R. *et al.* Mutations in the colony stimulating factor 1 receptor (CSF1R) gene cause hereditary diffuse leukoencephalopathy with spheroids. *Nat. Genet.* **44**, 200–205 (2011).
2. Kinoshita, M., Yoshida, K., Oyanagi, K., Hashimoto, T. & Ikeda, S. I. Hereditary diffuse leukoencephalopathy with axonal spheroids caused by R782H mutation in CSF1R: Case report. *J. Neurol. Sci.* **318**, 115–118 (2012).
3. Kleinfeld, K. *et al.* Adult-onset leukoencephalopathy with neuroaxonal spheroids and pigmented glia: report of five cases and a new mutation. *J. Neurol.* **260**, 558–71 (2013).
4. Kondo, Y., Kinoshita, M., Fukushima, K., Yoshida, K. & Ikeda, S. Early involvement of the corpus callosum in a patient with hereditary diffuse leukoencephalopathy with spheroids carrying the de novo K793T mutation of CSF1R. *Intern. Med.* **52**, 503–6 (2013).
5. Mitsui, J. *et al.* CSF1R mutations identified in three families with autosomal dominantly inherited leukoencephalopathy. *Am. J. Med. Genet. B. Neuropsychiatr. Genet.* **159B**, 951–7 (2012).
6. Ahmed, R. *et al.* A novel A781V mutation in the CSF1R gene causes hereditary diffuse leukoencephalopathy with axonal spheroids. *J. Neurol. Sci.* **332**, 141–144 (2013).
7. Fujioka, S. *et al.* An adult-onset leukoencephalopathy with axonal spheroids and pigmented glia accompanied by brain calcifications: a case report and a literature review of brain calcifications disorders. *J. Neurol.* **260**, 2665–8 (2013).
8. Guerreiro, R. *et al.* Genetic analysis of inherited leukodystrophies: genotype-phenotype correlations in the CSF1R gene. *JAMA Neurol.* **70**, 875–82 (2013).
9. Inui, T. *et al.* A new CSF1R mutation presenting with an extensive white matter lesion mimicking primary progressive multiple sclerosis. *J. Neurol. Sci.* **334**, 192–5 (2013).
10. Karle, K. N. *et al.* De novo mutations in hereditary diffuse leukoencephalopathy with axonal spheroids (HDLS). *Neurology* **81**, 2039–2044 (2013).

11. Nicholson, A. M. *et al.* CSF1R mutations link POLD and HDLS as a single disease entity. *Neurology* **80**, 1033–1040 (2013).
12. Saitoh, B.-Y. *et al.* A case of hereditary diffuse leukoencephalopathy with axonal spheroids caused by a de novo mutation in CSF1R masquerading as primary progressive multiple sclerosis. *Mult. Scler.* **19**, 1367–70 (2013).
13. Sundal, C. *et al.* Parkinsonian features in hereditary diffuse leukoencephalopathy with spheroids (HDLS) and CSF1R mutations. *Park. Relat. Disord.* **19**, 869–877 (2013).
14. Terasawa, Y. *et al.* Increasing and persistent DWI changes in a patient with hereditary diffuse leukoencephalopathy with spheroids. *J. Neurol. Sci.* **335**, 213–5 (2013).
15. Battisti, C. *et al.* Hereditary diffuse leukoencephalopathy with axonal spheroids: three patients with stroke-like presentation carrying new mutations in the CSF1R gene. *J. Neurol.* **261**, 768–72 (2014).
16. Hoffmann, S. *et al.* Enlarging the nosological spectrum of hereditary diffuse leukoencephalopathy with axonal spheroids (HDLS). *Brain Pathol.* (2014). doi:10.1111/bpa.12120
17. Kitani-Morii, F. *et al.* Hereditary Diffuse Leukoencephalopathy with Spheroids Characterized by Spastic Hemiplegia Preceding Mental Impairment. *Intern. Med.* **53**, 1377–1380 (2014).
18. Konno, T. *et al.* Haploinsufficiency of CSF-1R and clinicopathologic characterization in patients with HDLS. *Neurology* **82**, 139–48 (2014).
19. La Piana, R., Webber, A., Guiot, M.-C., Del Pilar Cortes, M. & Brais, B. A novel mutation in the CSF1R gene causes a variable leukoencephalopathy with spheroids. *Neurogenetics* **15**, 289–94 (2014).
20. Levin, J. *et al.* Diffuse leukoencephalopathy with spheroids: biopsy findings and a novel mutation. *Clin. Neurol. Neurosurg.* **122**, 113–5 (2014).
21. Schuberth, M. *et al.* [Hereditary diffuse leukencephalopathy with spheroids: a microgliopathy due to CSF1 receptor impairment]. *Nervenarzt* **85**, 465–70 (2014).
22. Sundal, C. *et al.* Hereditary diffuse leukoencephalopathy with spheroids with phenotype of primary progressive multiple sclerosis. *Eur. J. Neurol.* **22**, 328–33 (2015).
23. Kim, E.-J. *et al.* Adult-onset leukoencephalopathy with axonal spheroids and pigmented glia linked CSF1R mutation: Report of four Korean cases. *J. Neurol. Sci.* **349**, 232–8 (2015).
